# Supplementary material for: Maximum aerobic speed, maximum oxygen consumption, and running spatiotemporal parameters during an incremental test among middle- and long-distance runners and endurance non-running athletes
Source: PeerJ. 2022 Oct 5;10:e14035. doi: 10.7717/peerj.14035 (PMC9547581; doi:10.7717/peerj.14035)
Supplement: Supplemental Information 1 [file peerj-10-14035-s001.xlsx]

## Sheet: Hoja1
Legends:
Group, 1: non-runners; 2:runners
SR: Step rate (steps/s)
SL: stride length (m)
CT: contact time (s)
FT: flight time (s)
MAS: maximum aerobic speed (km/h)
Tlim: time limit to exhaustion at MAS test (s)
V8: 8 km/h at MAS test
V12: 12 km/h at MAS test
V12-MAS: intemrediate speed between 12 km/h and MAS
In: initial segment at Tlim test
Int: intermediate segment atTlim test
VO2max: VO2max (ml/kg∙min)
Lac: capillary blood lactate concentration
								MAS test
				Group	Age (years)	Height (cm)	Weight (kg)	MAS	SL V8	CT V8	FT V8	SR V8	SL V12	CT V12	FT V12	SR V12	SL V12-MAS	CT V12-MAS	FT V12-MAS	SR V12-MAS	SL MAS	CT MAS	FT MAS	SR VMAS	VO2max (MAS)	Lac MAS (mmol/l)
				1	24	178.4	71.7	19	0.84	0.32	0.057	2.95	1.13	0.212	0.127	2.85	1.46	0.216	0.135					234	74.1	7.9
				1	24	179	70.2	17	0.89	0.306	0.096	2.76	1.21	0.241	0.122	2.8	1.39	0.233	0.125	2.97	1.59	0.21	0.127	338	75.94	10.5
				1	26	180	76.7	18	0.97	0.349	0.087	2.51	1.33	0.274	0.125	2.7	1.54	0.246	0.125	2.92	1.72	0.215	0.128	441	68.79	8.4
				1	21	188.7	80.2	17	0.79	0.319	0.036	2.72	1.23	0.243	0.126	2.71	1.44	0.236	0.134	2.79	1.69	0.217	0.141	287	78.33	15.9
				1	25	179	66.6	20	0.82	0.284	0.087	2.7	1.23	0.254	0.116	2.84	1.57	0.214	0.139		1.85	0.188	0.145	362	64.2	15.2
				1	23	178	73.2	18	0.87	0.281	0.109	2.65	1.26	0.238	0.14	2.85	1.46	0.205	0.146	3	1.67	0.186	0.147	360	68.36	15.6
				2	23	172.2	68.2	22	0.82	0.332	0.037	2.77	1.2	0.246	0.115	3.04	1.55	0.19	0.14	3.31	1.85	0.173	0.129	265	80.34	12.7
				2	26	172.8	66.3	21	0.82	0.288	0.083	2.81	1.19	0.238	0.118	3.05	1.46	0.205	0.124	3.28	1.78	0.173	0.132	414	94.06	11.9
				2	27	173.5	66	21	0.84	0.29	0.088	2.73	1.22	0.224	0.143	2.76	1.61	0.208	0.156	2.96	1.97	0.197	0.141	343	75.17	14.7
				2	34	179.7	67	20	0.86	0.279	0.107	2.65	1.26	0.235	0.143	2.83	1.57	0.205	0.15	3.01	1.85	0.179	0.154	361	76.39	15.9
				2	26	177.5	66	21	0.85	0.317	0.068	2.63	1.27	0.225	0.156	2.77	1.61	0.197	0.165	2.94	1.89	0.181	0.159	309	76.55	13.3
				2	23	180.5	66.8	21	0.81	0.236	0.128	2.73	1.22	0.224	0.143	2.85	1.56	0.189	0.162	3.09	1.8	0.166	0.158	276	67.45	13.2
